# Supplementary material for: The Cannabinoid Receptor Interacting Proteins 1 of zebrafish are not required for morphological development, viability or fertility
Source: PubMed Central journal article supplement (PMC5501828; doi:10.1038/s41598-017-05017-5), 2017-07-07
Supplement: 41598_2017_5017_MOESM1_ESM.pdf [file 41598_2017_5017_MOESM1_ESM.pdf]

## SUPPLEMENTARY DATA for

The Cannabinoid Receptor Interacting Proteins 1 of zebrafish are not required for morphological development, viability or fertility.

Laura Fin, Giorgia Bergamin, Roberto A. Steiner and Simon M. Hughes\*

Randall Division of Cell and Molecular Biophysics, New Hunt's House, Guy's Campus, King's College London, London SE1 1UL UK.

### Figure S1

#### Position of **sequencing** and **HRM** primers and **upstream gRNA** on *cnrip1a*:

```

1   TATGCTCTGGATTACGGTATGGGTGTGATAATGTGTGATGATGACGTCACGGCATCTCTCAAACAGCTTCCCTGGGAGCAT
1   ATACGAGACCTAATGCCATACCCACACTATTACACACTACTACTGCAGTGCCGTAGAGAGTTTGTTCGAAGGACCCTCGTA

                                                                 M A D V
81  CCGTCCTGCATCCGTTCGAGTGACACCGGGAGCCCTGGAAACACACCGACCTCCGTTATCCAGCAGTCATGGCTGACGTTCC
81  GCCAGGACGTAGGCAGCTCACTGTGGCCCTCGGGACCTTTGTGTGGCTGGAGGCAATAGGTCGTCAGTACCGACTGCAAG

P A V I N I A V S L K I Q P N D G P V F Y K V D G T R
161  CCGCGGTAATAAACATCGCCGTTTCGTTGAAAATCCAGCCCAATGACGGGACCCGTGTTTTATAAGGTGGACGGGACGAGG
161  GGCGCCATTATTTGTAGCGCAAAGCAACTTTTAGGTCGGGTTACTGCCTGGGCACAAAATATCCACCTGCCCTGCTCC 2

F G Q T R T I K L L T G S K Y K I E V I T K P G S A E
241  TTCGGACAGACCAGGACGATCAAATTGCTGACGGGATCGAAATACAAAATCGAGGTGATCACGAAACCGGGCAGCGCCGA
241  AAGCCTGTCTGGTCCTGCTAGTTTAACGACTGCCCTAGCTTTATGTTTTAGCTCCACTAGTGCTTTGGCCCGTCGCGGCT 3

A
321  GGCCACGTAAGTCCGTCTGATATTGGATTTCTTTTACAATGTAATAATATGTTTGTTCATTAGAAAACAAGGTCGAAAGGT
321  CCGGTGCATTCAGGCAGACTATAACCTAAAGAAAATGTTACATTTATTATACAAAACAGTAATCTTTGTTCCAGCTTTCCA

401  GCACCCCTGCCTGATAAAAATATATTACATAGATACAGTATATACACGTAAGAAATATGTACA 461
401  CGTGGGACGGACTATTTTATATAATGTATCTATGTGCATATATGTGCATTCTTTATACATGT 461

```

### Position of **sequencing** and **HRM** primers and **downstream gRNA** on *cnrip1a* map:

1 TATGCTC**TGGATTACGGTATGGGTGTGA**TAATGTGTGATGATGACGTCACGGCATCTCTCAAACAGCTTCCTGGGAGCAT  
 1 ATACGAGACCTAATGCCATACCCACACTATTACACACTACTACTGCAGTGCCGTAGAGAGTTTGTGCAAGGACCTCGTA

**M A D V**

81 CGGTCCATGATCCGTCGAGTGACACCGGGAGCCCTGGAAACACACCGACCTCCGTTATCCAGCAGTCATGGCTGACGTTT  
 81 GCCAGGACGTAGGCAGCTCACTGTGGCCCTCGGGACCTTTGTGTGGCTGGAGGCAATAGGTCGTCAGTACCGACTGCAAG

**P A V I N I A V S L K I Q P N D G P V F Y K V D G T R**

161 CCGCGGTAATAAACATCGCCGTTTTCGTTGAAAATCCAGCCCAATGACGGAC**CCGTGTTTTATAAGGTGGACGG**GACGAGG  
 161 GGCGCCATTATTTGTAGCGGCAAGCAACTTTTAGGTCGGGTTACTGCCTGGGCACAAAATATTCACCTGCCCTGTCTC

**F G Q T R T I K L L T G S K Y K I E V I T K P G S A E**

241 TTCGGACAGACCAGGACGATCAAATTGCTGAC**GGGATCGAAATACAAAATCG**AGGTGATCACGAAACCGGGCAGCGCCGA  
 241 AAGCCTGTCTGGTCTGTAGTTTAACGACTGCCCTAGCTTTATGTTTTAGCTCCACTAGTGCTTTGGCCCGTCGCG**GCT**

**A**

321 GGCCACGTAAGTCCGTCTGATATTGGATTTCTTTTACAATGTAAATAATATGTTTGTTCATTAGAAAACAAGGTCGAAAGGT  
 321 **CCGGTGCATTACAGGC**AGACTATAACCTAAAGAAAATGTTACATTTATTATACAAAACAGTAATCT**TTGTTCCAGCTTTCCA**

401 GCACCCTGCCTGATAAAAATATATTACATAGATACAGTATATACACGTAAGAAATATGTACA 461  
 401 **CGTGG**GACGGACTATTTTATATAATGTATCTATGTATATATGTGCATTCTTTATACATGT 461

### Position of **sequencing** and **HRM** primers and **gRNA** on *cnrip1b* map:

1 GGGATTATTACTCGGGAACAGGAACCGCACACATGACTTTAGACCTGCTTTCTGCGATGCCGTTTTTTTCACGGTTTTTCCA  
 1 CCCTAATAATGAGCCCTTGTCTTGGCGTGTGACTGAAATCTGGACGAAAGACGCTACGGCAAAAAGTGCCAAAAGGT

**M**

81 CCGAATCGCGCTTTGCTTCAGCCGGCAGATCTTGAGCTGATTCTCCACACCTGAC**TGCCTTCATCTTCTTCTTCAT**TCAT  
 81 GGCTTAGCGCGAAACGAAGTCGGCCCGTCTAGAACTCGACTAAGAGGTGTGGACTGACGGAAGTAGAAGAAGAAGTAGTA

**A D I P Q L I K I G V S L K T T P N N G A V Y F K S**

161 GGCTGACATCCCGCAGCTCATTAATAATCGGCGTTTC**GCTGAAAACACACCGAATAAC**GGAGCCGTTTACTTCAAATCAG  
 161 CCGACTGTAGGGCGTCGAGTAATTTTAGCCGCAAGCGACTTTTGGTGTGGCTTATTGCCTCGGCAAAATGAAGTTTAGTC

**D G T R F G Q T R T I K L**

241 ACGGAACCAGATTCGGCCAGACCAGAACCATCAAACACTGACCGGAACTAAATACAAGATGGATGTGGTGGTCAAACCG  
 241 TGCCTTGGT**CTAAGCCGGTCTGGTCTTGG**TAGTTTGTGACTGACCGCTTGAT**TTATGTTCTACCTACACCACAG**TTTGGC

321 GGAGCAGTGGAGGCGACGTGAGTGAATTAATGATCATTGTTTATGTGTAAGTGAATGATAGACTATCTTTGATTATAT 400  
 321 CCTCGTCACCTCCGCTGCACTCACTTAATTACTAGTAAACAAA**TACACATTCACCTTACTATCTGA**TAGAAACTAATATA 400

**Fig. S1. Position of primers and gRNAs on *cnrip1a* and *cnrip1b*.** Position of CRISPR target sites on the exon 1 and intron 1 of *cnrip1a* and *cnrip1b*, sequences and features of sequencing and HRM primers for each chosen CRISPR target site and their positions on the respective gene sequences. Accession numbers: *cnrip1a* (GenBank AN: NM\_001003607.2; Uniprot AN: [Q6DBX3](#)), *cnrip1b* (GenBank AN: XM\_679802.4; Uniprot AN: [E9QJH9](#)). For each gene the amino acid sequence in bold corresponds to the translated region of the first exon of the gene. gRNAs are highlighted and primers underlined and colour coded in pairs.

**Table S1. Quantitative evidence for reproducibility of results**

| Figure Number and panel or Experiment                                                                                                    | Wild-type                                                                                                                                                                                                                                                                                                | Heterozygote sibling                      | Mutant sibling                                          |
|------------------------------------------------------------------------------------------------------------------------------------------|----------------------------------------------------------------------------------------------------------------------------------------------------------------------------------------------------------------------------------------------------------------------------------------------------------|-------------------------------------------|---------------------------------------------------------|
| 2a 8ss                                                                                                                                   | 10 + 15                                                                                                                                                                                                                                                                                                  | n/a                                       | n/a                                                     |
| 2a 15ss                                                                                                                                  | 10 + 12                                                                                                                                                                                                                                                                                                  | n/a                                       | n/a                                                     |
| 2a 24hpf wholemount<br>flatmount                                                                                                         | 30 + 20 + 20<br>5 + 6                                                                                                                                                                                                                                                                                    | n/a<br>n/a                                | n/a<br>n/a                                              |
| 2a 48hpf                                                                                                                                 | 30 + 15 + 15                                                                                                                                                                                                                                                                                             | n/a                                       | n/a                                                     |
| 2b 15ss                                                                                                                                  | 10 + 10                                                                                                                                                                                                                                                                                                  | n/a                                       | n/a                                                     |
| 2a 24hpf                                                                                                                                 | 30 + 25 + 14                                                                                                                                                                                                                                                                                             | n/a                                       | n/a                                                     |
| 2a 48hpf                                                                                                                                 | 20 + 10 + 15                                                                                                                                                                                                                                                                                             | n/a                                       | n/a                                                     |
|                                                                                                                                          |                                                                                                                                                                                                                                                                                                          |                                           |                                                         |
| 3b 24hpf                                                                                                                                 | 8/42 (19%)                                                                                                                                                                                                                                                                                               | 24/42 (57%)                               | 10/42 (24%)                                             |
| 3b 48hpf                                                                                                                                 | 14/53 (26%)                                                                                                                                                                                                                                                                                              | 27/53 (51%)                               | 12/53 (23%) $\chi^2 = 0.54$                             |
| 3c 24hpf                                                                                                                                 | 10/36 (28%)                                                                                                                                                                                                                                                                                              | 19/36 (53%)                               | 7/36 (19%)                                              |
| 3c 48hpf                                                                                                                                 | 11/40 (27.5%)                                                                                                                                                                                                                                                                                            | 21/40 (52.5%)                             | 8/40 (20%) $\chi^2 = 0.56$                              |
|                                                                                                                                          |                                                                                                                                                                                                                                                                                                          |                                           |                                                         |
| <i>cnrip1a</i> <sup>kg98/+</sup> incross survival<br>(63 + 140 + 28)/<br>(67 + 157 + 30) (91%)                                           | (3 + 3 + 6)/<br>(15 + 20 + 20)<br>(22%)                                                                                                                                                                                                                                                                  | (9 + 11 + 10)/<br>(15 + 20 + 20)<br>(55%) | (4 + 5 + 3)/<br>(15 + 20 + 20)<br>(22%) $\chi^2 = 0.78$ |
| <i>cnrip1a</i> <sup>kg96/+</sup> incross survival<br>(54 + 107 + 80)/<br>(57 + 124 + 89) (89%)                                           | (5 + 8 + 4)/<br>(20 + 25 + 15)<br>(28%)                                                                                                                                                                                                                                                                  | (11 + 12 + 8)/<br>(20 + 25 + 15)<br>(52%) | (4 + 5 + 3)/<br>(20 + 25 + 15)<br>(20%) $\chi^2 = 0.64$ |
| <i>cnrip1b</i> <sup>kg101/+</sup> incross survival<br>(105 + 52 + 86)/<br>(109 + 65 + 92) (91%)                                          | (7 + 5 + 4)/<br>(25 + 15 + 20)<br>(27%)                                                                                                                                                                                                                                                                  | (13 + 7 + 12)/<br>(25 + 15 + 20)<br>(53%) | (5 + 3 + 4)/<br>(25 + 15 + 20)<br>(20%) $\chi^2 = 0.67$ |
| <i>cnrip1a</i> <sup>kg98/+</sup> incross<br>morphogenesis                                                                                | 0/50 (Mutants found at 6 months at 11/31 ( $\chi^2 = 0.17$ ))                                                                                                                                                                                                                                            |                                           |                                                         |
| <i>cnrip1a</i> <sup>kg96/+</sup> incross<br>morphogenesis                                                                                | 0/50 (Not assessed at adults)                                                                                                                                                                                                                                                                            |                                           |                                                         |
| <i>cnrip1b</i> <sup>kg101/+</sup> incross<br>morphogenesis                                                                               | 0/50 (Mutants found at 4 months at 1/13 ( $\chi^2 = 0.15$ ))                                                                                                                                                                                                                                             |                                           |                                                         |
| <i>cnrip1a</i> <sup>kg98/kg98</sup> MZ incross                                                                                           | n/a                                                                                                                                                                                                                                                                                                      | n/a                                       | 50/50 normal to 5 dpf                                   |
| <i>cnrip1b</i> <sup>kg101/kg101</sup> MZ incross                                                                                         | n/a                                                                                                                                                                                                                                                                                                      | n/a                                       | 50/50 normal to 5 dpf                                   |
|                                                                                                                                          |                                                                                                                                                                                                                                                                                                          |                                           |                                                         |
| <i>cnrip1a</i> <sup>kg98/+</sup> ; <i>cnrip1b</i> <sup>kg101/+</sup><br>incross survival at 11<br>months: (all ~100 appear<br>wild-type) | <i>cnrip1a</i> +/+; <i>cnrip1b</i> +/+, +/+;+/-, +/+;-/-, +/+;+/-, +/+;-/-, +/+;-/-, -/-;+/-, -/-;+/-, -/-;-/-<br>Genotyped 33: 0, 3, 2, 5, 9, 5, 1, 6, 2<br>Expected: 2.06 4.12 2.06 4.12 8.25 4.12 2.06 4.12 2.06<br>$\chi^2 = 0.84$ (Both male and female double mutants still breeding at 18 months) |                                           |                                                         |
|                                                                                                                                          |                                                                                                                                                                                                                                                                                                          |                                           |                                                         |
| 4b morphology                                                                                                                            | n/a                                                                                                                                                                                                                                                                                                      | n/a                                       | 10/10                                                   |
| 4c morphology                                                                                                                            | n/a                                                                                                                                                                                                                                                                                                      | n/a                                       | 10/10                                                   |
| 4b,c behaviour                                                                                                                           | n/a                                                                                                                                                                                                                                                                                                      | n/a                                       | 67/67                                                   |
| 4d morphology                                                                                                                            | n/a                                                                                                                                                                                                                                                                                                      | n/a                                       | 10/10 + 2/2                                             |
| 4d behaviour                                                                                                                             | n/a                                                                                                                                                                                                                                                                                                      | n/a                                       | 45/45                                                   |
| 4d survival to 5 dpf                                                                                                                     | n/a                                                                                                                                                                                                                                                                                                      | n/a                                       | 67/67 + 45/45                                           |
| 4d survival to 3 months                                                                                                                  | n/a                                                                                                                                                                                                                                                                                                      | n/a                                       | 40/54 (75%)                                             |

Double numbers separated by '+' indicate replicate experiments on separate lays.

2a 8ss - number of embryos with not-spatially-restricted expression.

2a 15ss - number of embryos with not-spatially-restricted expression and concentration of signal in hindbrain spots and ventral regions.

2a 24 hpf- number of embryos with elevated expression in bilateral neural clusters in telencephalon, midbrain, hindbrain and spinal cord and lateral expression in cranial ganglia.

2a 48 hpf - number of embryos with most intense signal in brain, weak expression in retina and little expression in pectoral fin bud, trunk and tail.

2b 15ss - number of embryos with not-spatially-restricted expression.

2b 24 hpf- number of embryos with widespread expression and more intense signal in head and eyes.  
 2b 48 hpf - number of embryos with predominant cranial expression and weak pectoral fin bud expression.  
 3b,c - numbers of genotyped embryos with, respectively, strong (wild-type), medium (het) and weak (mutant) expression/total embryos analysed (%).  $\chi^2$  test results are given for each mutant in rightmost column showing Mendelian frequencies.

Single mutant incross survival: Values in left column represent numbers of embryos surviving at 48 hpf out of total in each lay. Values in columns 2-4 represent numbers of embryos of each genotype out of total genotyped at 48 hpf in three separate lays.  $\chi^2$  test result is given in rightmost column showing Mendelian frequencies. MZ = maternal zygotic mutants.

Single mutant incross morphogenesis: Values represent the number of affected embryos observed/ total screened daily until 5 dpf and weekly thereafter for consistent defects affecting brain, eye, heart or general body size and morphology and behaviour. The entire lay was not retrospectively genotyped, but mutants were found at expected Mendelian frequencies in genotyped individuals, as described in parantheses.

4b morphology - fraction of 25 hpf embryos observed under dark field that showed normal mid-hindbrain border fold, somite morphology, overall body shape, heart beat, eye size and shape.

4c morphology - fraction of 27 hpf embryos with normal eye size, retinal folding, lens size and position, ear size and morphology, somite number, chevron shape, size, morphology and apposition, notochord refractivity, size, regularity and vacuolation, red blood cell formation in ventral tail.

4b,c behaviour - fraction of 25-27 hpf embryos with spontaneous movements in chorion and response by movement to dish tap and/or poke of chorion with forceps, normal heartbeat and circulation through tail.

4d survival – fraction exiting chorion by 4 dpf

4d morphology - fraction of 8 dpf embryos with normal eye size, pigmentation, lens position and size, fin length and shape, ear morphology, size and presence of otic vesicles, melanophore and xanthophore frequency, distribution and shape, notochord structure, swim bladder inflation and jaw shape.

4d behaviour - fraction of 8 dpf embryos with normal swimming (spontaneous and response to tank tap), eye movements (spontaneous and response to shadow), fin burst movements (spontaneous), gut food content and peristalsis, air gulping to inflate swim bladder.

**Table S2. IMAGE clones encoding *cnrip1a* and *cnrip1b*.**

| <b>Feature</b>           | <b>IMAGE ID: 7149263</b>               | <b>IMAGE ID: 8760081</b>                                     |
|--------------------------|----------------------------------------|--------------------------------------------------------------|
| <b>cDNA coding for</b>   | Cnrip1a                                | Cnrip1b                                                      |
| <b>Insert size</b>       | 850 bp                                 | 1015 bp                                                      |
| <b>Region covered</b>    | 50% 5'UTR. Coding exons 1-3. 30% 3'UTR | 60% coding region of Exon 1. Coding exons 2+3. 350 bp 3'UTR. |
| <b>BLAT result</b>       | 3 regions of Chr 1 >99%                | 3 regions of Chr 13 >99%                                     |
| <b>Restriction sites</b> | SfiIA and SfiIB                        | NotI and EcoRV                                               |

**Table S3. Primer pairs for RNA polymerase site insertion (ISH probes generation).**

| Primer pairs                                                                                                                            | Gene           |
|-----------------------------------------------------------------------------------------------------------------------------------------|----------------|
| Fwd :<br><b>TAATACGACTCACTATAGGGAGATGGATAACCGTATTACCGC</b><br>C<br>Rev :<br>CGCGCA <b>ATTAACCCTCACTAAAG</b> CACTAGTCATACCAGGATC         | <i>cnrip1a</i> |
| Fwd :<br><b>TAATACGACTCACTATAGGGAGAACTCAGGCGGGTGTTTTTC</b><br>Rev :<br>GGATCC <b>ATTAACCCTCACTAAAGGGA</b> ACTATAATAATTGA<br>TGTGCCGTGTC | <i>cnrip1b</i> |

T7 (Fwd sense, negative control) and T3 (Rev antisense) consensus sequences are shown in bold font.

**Table S4. Reaction mixture composition and amplification cycle parameters for RNA polymerase site insertion.**

| Reagent             | Quantity            | Reaction cycle                                                                                                                                                                        |
|---------------------|---------------------|---------------------------------------------------------------------------------------------------------------------------------------------------------------------------------------|
| DNA template        | 50 ng               | 95°C for 4 minutes<br>95°C for 30 seconds<br>63°C for 30 seconds<br>72°C for 2 minutes<br>72°C for 7 minutes <span style="font-size: 2em; vertical-align: middle;">}</span> 35 cycles |
| 10X Reaction Buffer | 2.5 µl              |                                                                                                                                                                                       |
| dNTPs mix           | 0.4 µl<br>(0.4 mM)  |                                                                                                                                                                                       |
| Forward primer      | 1.25 µl<br>(0.5 µM) |                                                                                                                                                                                       |
| Reverse primer      | 1.25 µl<br>(0.5 µM) |                                                                                                                                                                                       |
| Vent DNA polymerase | 0.5 µl (1 U)        |                                                                                                                                                                                       |
| MilliQ water        | to 25 µl            |                                                                                                                                                                                       |

Annealing temperature for primers (63°C) was calculated using the NEB Tm calculator (<http://tmcalculator.neb.com>).
